# Supplementary material for: Single-cell profiling identifies impaired adaptive NK cells expanded after HCMV reactivation in haploidentical HSCT
Source: JCI Insight. 2021 Jun 22;6(12):e146973. doi: 10.1172/jci.insight.146973 (PMC8262468; doi:10.1172/jci.insight.146973)
Supplement: Supplemental data [file jciinsight-6-146973-s022.pdf]

# Single-cell profiling identifies impaired adaptive NK cells expanded after HCMV reactivation in haploidentical-HSCT

Elisa Zaghi<sup>1</sup>, Michela Calvi<sup>1,2</sup>, Simone Puccio<sup>3</sup>, Gianmarco Spata<sup>1</sup>, Sara Terzoli<sup>1</sup>, Clelia Peano<sup>4</sup>, Alessandra Roberto<sup>3</sup>, Federica De Paoli<sup>3</sup>, Jasper J.P. van Beek<sup>3</sup>, Jacopo Mariotti<sup>5</sup>, Chiara De Philippis<sup>5</sup>, Barbara Sarina<sup>5</sup>, Rossana Mineri<sup>6</sup>, Stefania Bramanti<sup>5</sup>, Armando Santoro<sup>5</sup>, Vu Thuy Khanh Le-Trilling<sup>7</sup>, Mirko Trilling<sup>7</sup>, Emanuela Marcenaro<sup>8</sup>, Luca Castagna<sup>5</sup>, Clara Di Vito<sup>1,2†\*</sup>, Enrico Lugli<sup>3,9</sup> and Domenico Mavilio<sup>1,2†\*</sup>

<sup>1</sup>Unit of Clinical and Experimental Immunology, IRCCS Humanitas Research Hospital, Rozzano, Milan, Italy;

<sup>2</sup>BIOMETRA, Università degli Studi di Milano, Milan, Italy;

<sup>3</sup>Laboratory of Translational Immunology, IRCCS Humanitas Research Hospital, Rozzano, Milan, Italy;

<sup>4</sup>Institute of Genetic and Biomedical Research, UoS Milan, National Research Council, and Genomic Unit, IRCCS Humanitas Research Hospital, Italy;

<sup>5</sup>Bone Marrow Transplant Unit, IRCCS Humanitas Research Hospital, Rozzano, Milan, Italy;

<sup>6</sup>Molecular Biology Section, Clinical Investigation Laboratory, IRCCS Humanitas Research Hospital, Rozzano, Italy;

<sup>7</sup>Institute for Virology, University Hospital Essen, University Duisburg-Essen, Essen, Germany;

<sup>8</sup>Department of Experimental Medicine, University of Genoa, Genoa, Italy;

<sup>9</sup>Flow Cytometry Core, IRCCS Humanitas Research Hospital, Rozzano, Milan, Italy.

<sup>†</sup>These authors contributed equally to this work

## \* Corresponding authors:

Domenico Mavilio, M.D., Ph.D.

Unit of Clinical and Experimental Immunology

Department of Medical Biotechnologies and Translational Medicine

University of Milan School of Medicine

IRCCS Humanitas Research Hospital

Via Alessandro Manzoni, 113, Rozzano (Milan), Italy.

Phone: +39-02.8224.5157 FAX: +39-02.8224.5191

e-mail: [domenico.mavilio@unimi.it](mailto:domenico.mavilio@unimi.it)

Clara Di Vito, Ph.D.

Unit of Clinical and Experimental Immunology

Department of Medical Biotechnologies and Translational Medicine

University of Milan

IRCCS Humanitas Research Hospital

Via Alessandro Manzoni, 113, Rozzano (Milan), Italy.

Phone: +39 02 8224 5220

e-mail: [clara.di\\_vito@humanitasresearch.it](mailto:clara.di_vito@humanitasresearch.it)

## Supplemental data

### Supplementary Figures

Fig. S1. NK cell gating strategy

Fig. S2. NK cell marker dynamic expression in MR h-HSCT patients

Fig. S3. NK cell subset distribution in FACS-sorted KIR<sup>pos</sup> and KIR<sup>neg</sup> NK cells

Fig. S4. KIR<sup>pos</sup> NK cells from R show a different expression profile compared to KIR<sup>neg</sup> NK cells from R and KIR<sup>pos</sup> NK cells from NR

Fig. S5. HCMV-driven transcriptional changes in KIR<sup>pos</sup> NK cell from R

Fig. S6. IFN- $\gamma$  inducible expression of PD-L1 and HLA-II on HUVEC

Fig. S7. KIR<sup>pos</sup> NK cell frequency does not correlate with the OS

### Supplementary Table

Table S1. List of antibodies used in flow cytometry panels

## Supplementary Figures

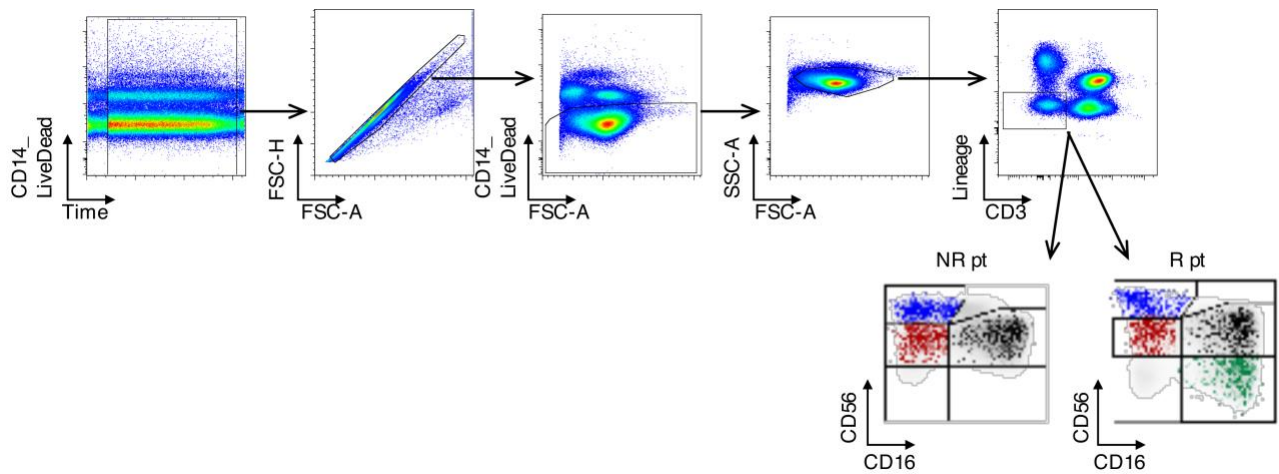

**Fig. S1. NK cell gating strategy**

Flow cytometry dot plots showing the gating strategy used to identify NK cells within CD14<sup>neg</sup>/CD3<sup>neg</sup> and Lineage<sup>neg</sup> (CD4, CD15, CD20, CD19, CD33, CD34, CD203c, FCεRI) viable lymphocytes and the NK cell subset distribution on the basis of their CD56 and CD16 surface expression from representative patients either experiencing (R, right, pt#27) or not (NR, left, pt#3) HCMV infection/reactivation at 10-12 months after h-HSCT. CD56<sup>bright</sup>/CD16<sup>neg</sup> (CD56<sup>br</sup>) NK cells are depicted in blue, CD56<sup>dim</sup>/CD16<sup>pos</sup> (CD56<sup>dim</sup>) NK cells are depicted in black, unconventional CD56<sup>dim</sup>/CD16<sup>neg</sup> (unCD56<sup>dim</sup>) are depicted in red and CD56<sup>neg</sup>/CD16<sup>pos</sup> (CD56<sup>neg</sup>) NK cells are depicted in green.

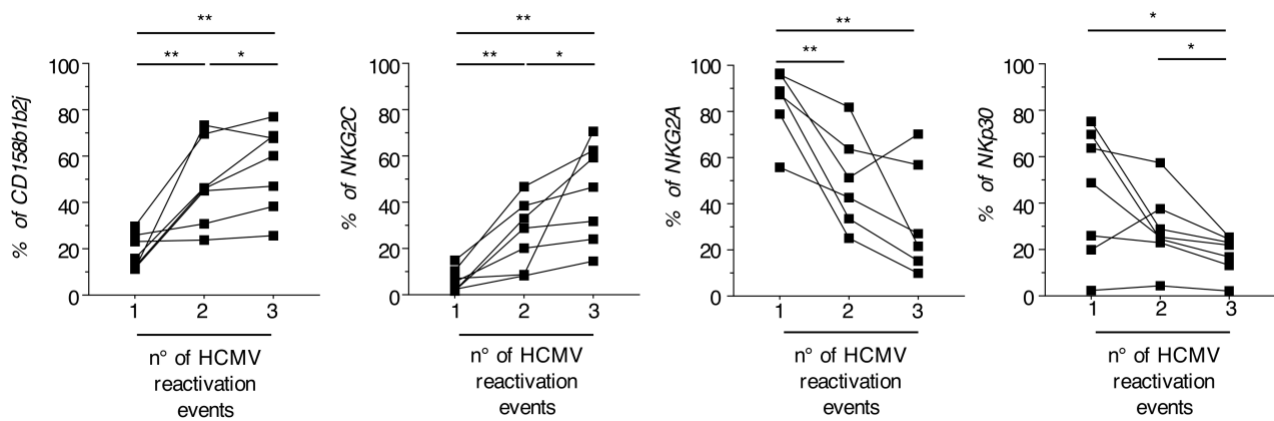

**Fig. S2. NK cell marker dynamic expression in MR h-HSCT patients**

Summary statistical graphs showing the frequencies (%) of CD158b1b2j, NKG2C, NKG2A, and Nkp30 on total NK cells on recipients (n=7) experiencing HCMV multiple reactivation events (n°=1, 2, and 3) after h-HSCT. Blood samples of MR were analyzed at the first available time point (range: 0-21 days) after the pick of viremia defining HCMV reactivation events. Paired t-test.

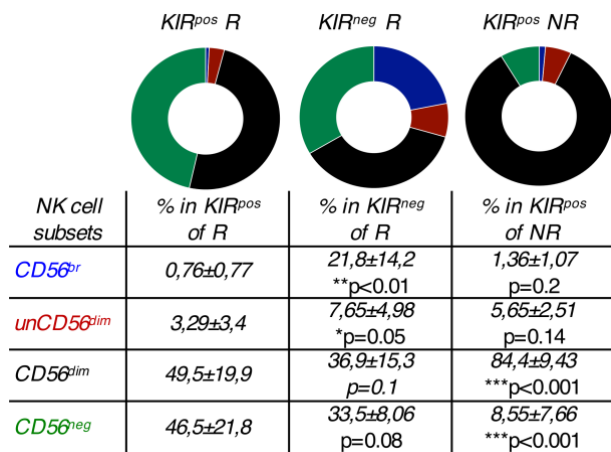

**Fig. S3. NK cell subset distribution in FACS-sorted KIR<sup>pos</sup> and KIR<sup>neg</sup> NK cells**

Pie charts depicted the NK cell subset distribution within the FACS-sorted KIR<sup>pos</sup> and KIR<sup>neg</sup> NK cells (n=7) recipients at 7-12 months after h-HSCT. The relative frequencies of NK cell subsets (mean ± SD) and p-values vs KIR<sup>pos</sup> NK cells of R are reported. Paired t-test vs KIR<sup>neg</sup> of NR; Unpaired t-test vs KIR<sup>pos</sup> R.

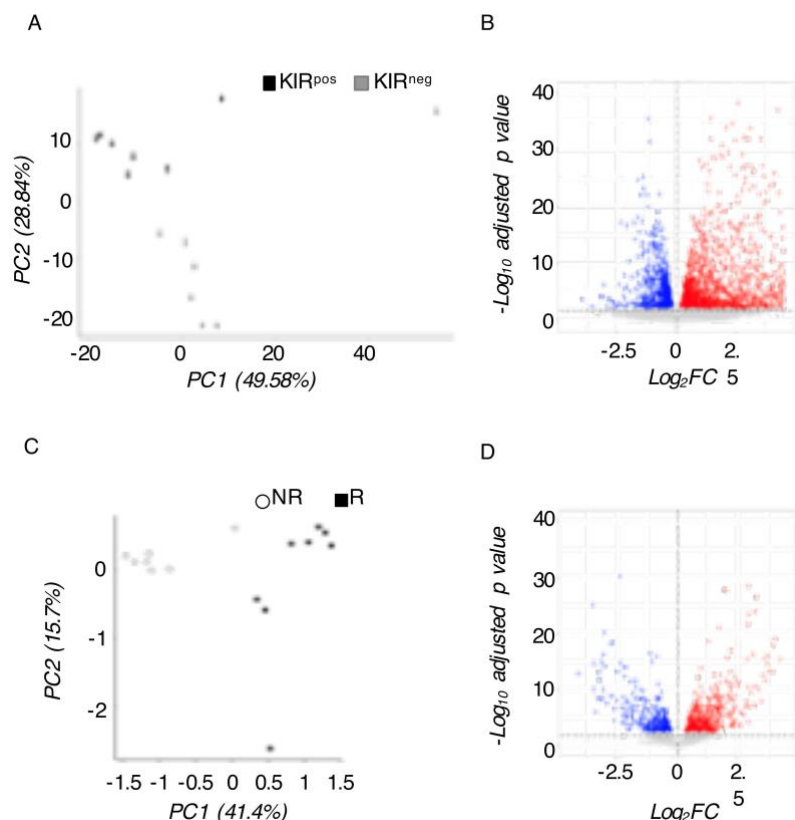

**Fig. S4. KIR<sup>pos</sup> NK cells from R show a different expression profile compared to KIR<sup>neg</sup> NK cells from R and KIR<sup>pos</sup> NK cells from NR**

(A) PCA scatter plots showing the bi-dimensional distribution of in KIR<sup>neg</sup> (■) and KIR<sup>pos</sup> (■) FACS-sorted NK cells from R recipients after 7-12 months after h-HSCT (n=7). (B) Volcano plot representing the deregulated genes between KIR<sup>neg</sup> and KIR<sup>pos</sup> FACS-sorted NK cells. The differentially upregulated (red), downregulated (blue), and stable (gray) genes in KIR<sup>pos</sup> NK cells are depicted. (C) PCA scatter plots of gene expression in KIR<sup>pos</sup> NK cells FACS-sorted from NR (○; n=8) and R (■; n=7) after 7-12 months after h-HSCT. (D) Volcano plot representing the deregulated genes between KIR<sup>pos</sup> FACS-sorted NK cells from R and NR. The differentially upregulated (red), downregulated (blue), and stable (gray) genes in KIR<sup>pos</sup> NK cells from NR are depicted.

A

| GENE ONTOLOGY                                   | NES  | FDR q-value |
|-------------------------------------------------|------|-------------|
| GO_REGULATION_OF_CELLULAR_COMPONENT_MOVEMENT    | 2,80 | 0,002074    |
| GO_POSITIVE_REGULATION_OF_LOCOMOTION            | 2,51 | 0,013466    |
| GO_POSITIVE_REGULATION_OF_CHEMOTAXIS            | 2,39 | 0,025039    |
| GO_REGULATION_OF_ACTIN_FILAMENT_BUNDLE_ASSEMBLY | 2,38 | 0,025315    |
| GO_TAXIS                                        | 2,31 | 0,031714    |
| GO_REGULATION_OF_ACTIN_FILAMENT_BASED_PROCESS   | 2,26 | 0,031429    |
| GO_REGULATION_OF_CHEMOTAXIS                     | 2,24 | 0,032622    |
| GO_CELL_CHEMOTAXIS                              | 2,21 | 0,036473    |
| GO_LEUKOCYTE_MIGRATION                          | 2,21 | 0,036062    |
| GO_ACTIN_FILAMENT_BASED_PROCESS                 | 2,14 | 0,047366    |
| GO_REGULATION_OF_LAMELLIPODIUM_ORGANIZATION     | 2,15 | 0,04758     |

B

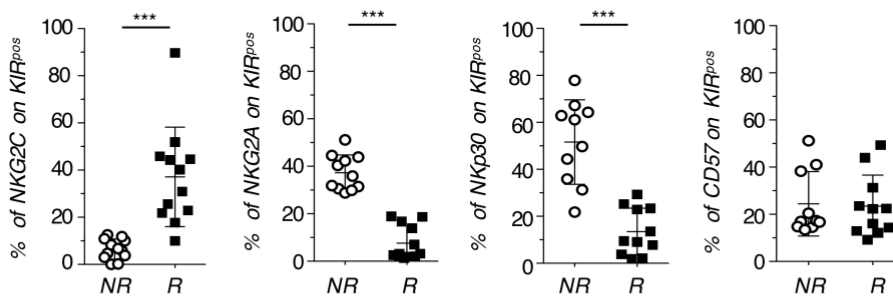

C

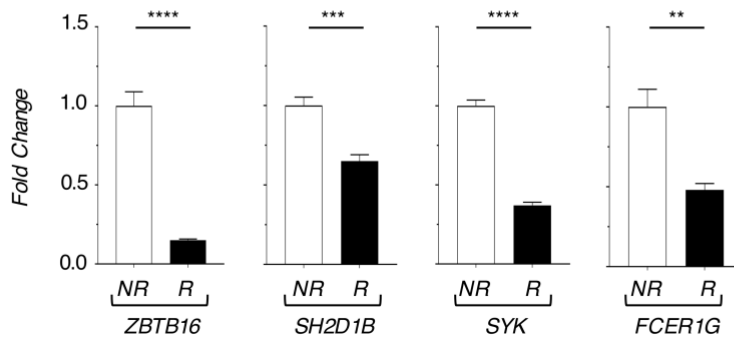

**Fig. S5. HCMV-driven transcriptional changes in KIR<sup>pos</sup> NK cell from R**

(A) NES and FDR of GO signature involved in cell migration enriched in NR vs R. (B) Summary statistical graphs showing the expression (%; mean  $\pm$  SD) of NKG2C, NKG2A, Nkp30, and CD57 on NK cells in NR (○, n=12) and R (■, n=12) patients at 7-12 months post-h-HSCT. Unpaired t-test. (C) Summary statistical graphs showing the expression levels of *ZBTB16*/PLZF, *SH2D1B*/EAT-2, *SYK*/SYK, and *FCER1G*/FcεRγ genes assessed by semi-quantitative real-time PCR on FACS-sorted KIR<sup>pos</sup> NK cells in NR (○; n=6) and in R (■; n=6) patients at 8-12 months post-h-HSCT. Each sample was analyzed in triplicate. Gene expression was normalized on KIR<sup>pos</sup> NK cells of NR h-HSCT patients. Unpaired t-test.

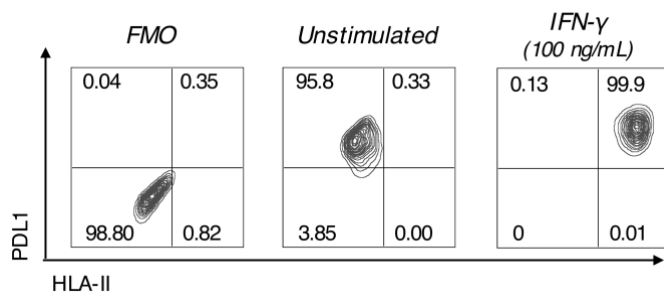

**Fig. S6. IFN- $\gamma$  inducible expression of PD-L1 and HLA-II on HUVEC**

Representative flow cytometry contour plots showing the surface expression of PD-L1 and HLA-II on HUVEC either in the presence or in the absence of stimulation with IFN- $\gamma$  (100 ng/mL) for 72 hours. Fluorescence minus one (FMO) was used to set the gate on positive population.

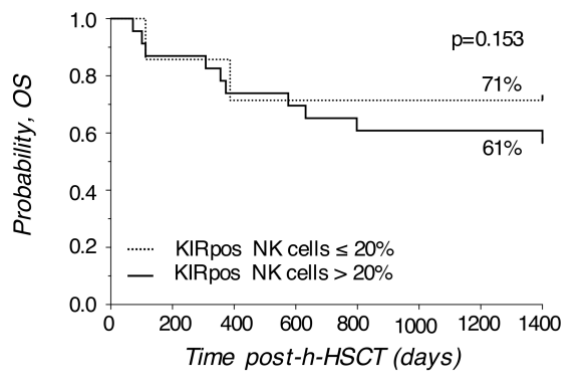

**Figure S7. KIR<sup>pos</sup> NK cell frequency does not correlate with the OS**

Kaplan-Meier curve depicting the 4-years OS in h-HSCT patients subdivided based on the KIR<sup>pos</sup> NK cell frequencies (KIR<sup>pos</sup> NK cells <20%, n=7, dotted line; KIR<sup>pos</sup> NK cells >20%, n=19, solid line).

**Table S1. List of antibodies used in flow cytometry panels**

| <b>Antibody (mAb)</b> | <b>Clone</b> | <b>Fluorochrome</b> | <b>Company</b>  |
|-----------------------|--------------|---------------------|-----------------|
| Anti-CD4              | 13B8.2       | FITC                | Beckman Coulter |
| Anti-CD15             | 80H5         | FITC                | Beckman Coulter |
| Anti-CD20             | 2H7          | FITC                | BioLegend       |
| Anti-CD33             | HIM3-4       | FITC                | BioLegend       |
| Anti-CD34             | 561          | FITC                | BioLegend       |
| Anti-CD203c           | NP4D6        | FITC                | BioLegend       |
| Anti-FCeRI            | AER37        | FITC                | BioLegend       |
| Anti-CD19             | SJ25C1       | FITC                | BD Biosciences  |
| Anti-CD14             | M5E2         | BV510               | BioLegend       |
| Anti-CD3              | UCHT1        | BUV661              | BD Biosciences  |
| Anti-CD16             | 3G8          | BUV737              | BD Biosciences  |
| Anti-CD16             | 3G8          | PE-Cy7              | BD Biosciences  |
| Anti-CD56             | NCAM16-2     | BUV563              | BD Biosciences  |
| Anti-NKG2A            | REA110       | PE-Vio770           | Miltenyi        |
| Anti-NKG2C            | 134591       | AF700               | R&D             |
| Anti-NKG2C            | 134591       | BV650               | BD Biosciences  |
| Anti-CD57             | REA769       | PE-Vio615           | Miltenyi        |
| Anti-CD8              | RPA-T8       | BV650               | BD Biosciences  |
| Anti-CD158b1b2j       | CHL          | BUV395              | BD Biosciences  |
| Anti-CD158b1b2j       | GL183        | PE-Cy5.5            | Beckman Coulter |
| Anti-CD158a           | HP3E4        | BV711               | BD Biosciences  |
| Anti-CD158e           | DX9          | APC                 | Miltenyi        |
| Anti-CD158e1/e2       | Z27.3.7      | PE                  | Beckman Coulter |
| Anti-NKp30            | Z25          | PE-Cy5              | Beckman Coulter |
| Anti-NKp46            | 9E2          | BV605               | BioLegend       |
| Anti-PD1              | PD1.3.1.3    | APC                 | Miltenyi        |
| Anti-PD1              | EH12.1       | BV711               | BD Biosciences  |
| Anti-CD127            | eBIORDR5     | APCeFluor780        | eBiosciences    |
| Anti-CRTh2            | BM16         | PerCP-Cy5.5         | BioLegend       |
| Anti-CD117            | 104D2        | BV786               | BioLegend       |
| Anti-IFN- $\gamma$    | B27          | BUV395              | BD Biosciences  |
| Anti-PDL1             | MIH1         | PE-CF594            | BD Biosciences  |
| Anti-HLA-DR/DP/DQ     | Tu39         | FITC                | BD Biosciences  |
